# Supplementary material for: Androgens regulate ovarian gene expression by balancing Ezh2-Jmjd3 mediated H3K27me3 dynamics
Source: PLoS Genet. 2021 Mar 30;17(3):e1009483. doi: 10.1371/journal.pgen.1009483 (PMC8034747; doi:10.1371/journal.pgen.1009483)
Supplement: S2 Dataset — (XLSX) [file pgen.1009483.s010.xlsx]

## Sheet: Sheet1
S2 Data
Genes with H3K27me3 peaks in the gene body of control samples	Genes with H3K27me3 peaks in the gene body of DHT treated samples	Common genes with H3K27me3 peaks in the gene body of Control - DHT treated samples
0610010F05Rik	0610010F05Rik	Prdm16
0610040F04Rik	1500009L16Rik	Cnih3
1110028F18Rik	1700003P14Rik	Plekhg1
1110051M20Rik	1700024G13Rik	Fam149a
1500012K07Rik	1700024I08Rik	Ccny
1600010M07Rik	1700028E10Rik	Fam155a
1600012H06Rik	1700093K21Rik	4930474G06Rik
1700001G01Rik	2210408I21Rik	4933424G05Rik
1700001L19Rik	2310022B05Rik	Cpne8
1700003P14Rik	2510009E07Rik	Grm8
1700007J10Rik	2610035D17Rik	Otud7a
1700008P02Rik	2610206C17Rik	Pecam1
1700010I02Rik	2700049A03Rik	Sos1
1700010J16Rik	2700054A10Rik	Usp45
1700011L22Rik	2700089I24Rik	Syt1
1700012B07Rik	2810404M03Rik	Cnot10
1700012I11Rik	2900026A02Rik	Ubn2
1700016L21Rik	3110039I08Rik	Slamf6
1700019D03Rik	3110070M22Rik	Rnf217
1700020G17Rik	3830408C21Rik	Ggnbp2
1700022H16Rik	4430402I18Rik	Sh3gl2
1700024G13Rik	4921517D22Rik	Gm364
1700024I08Rik	4921539E11Rik	Kctd16
1700024N05Rik	4930412C18Rik	Asah2
1700025C18Rik	4930425L21Rik	Tmcc1
1700025G04Rik	4930428E07Rik	Tiam2
1700028E10Rik	4930452A19Rik	Trpm8
1700034K08Rik	4930473A02Rik	Sgcz
1700040D17Rik	4930473O22Rik	Cpne4
1700045H11Rik	4930474G06Rik	Hsd11b1
1700055D16Rik	4930525C09Rik	Ptprt
1700057G04Rik	4930526H09Rik	Ptprq
1700060C16Rik	4930528G23Rik	Exoc6b
1700061I17Rik	4930539C22Rik	Mss51
1700064M15Rik	4930553C11Rik	Fubp1
1700066N21Rik	4930554G24Rik	Cyp4b1
1700069L16Rik	4930557F10Rik	Unc5d
1700095A21Rik	4930567H12Rik	Ptprg
1700101O22Rik	4930578E11Rik	5330416C01Rik
1700109G14Rik	4930586N03Rik	Ptprc
1700111N16Rik	4931403E22Rik	4930425L21Rik
1700113H08Rik	4931408C20Rik	Sacs
1700120E14Rik	4931429P17Rik	Gm15555
1700123O12Rik	4932441J04Rik	Ptprk
2010106E10Rik	4933404K08Rik	4931429P17Rik
2210408I21Rik	4933424G05Rik	1700024G13Rik
2310005E17Rik	4933425B07Rik	Dpysl2
2310016D03Rik	5330416C01Rik	Magi1
2310057M21Rik	5430425K12Rik	Gm10754
2310065F04Rik	5530401A14Rik	Dst
2510009E07Rik	5730403I07Rik	Mlip
2610008E11Rik	5730522E02Rik	Dsp
2610307P16Rik	5830411N06Rik	Smo
2610316D01Rik	9130015L21Rik	Raph1
2700049A03Rik	9330175M20Rik	Dcaf6
2700054A10Rik	9530026P05Rik	Slc22a2
2700069I18Rik	9530036O11Rik	Tbxas1
2700089I24Rik	A330008L17Rik	Arhgef9
2810032G03Rik	A530016L24Rik	Arid4b
2810403D21Rik	A830018L16Rik	Gsg1l
2810404M03Rik	A930011G23Rik	Ntm
2900079G21Rik	AV064505	Dip2c
3110039I08Rik	Abca13	Adcy2
3110039M20Rik	Abca8b	Cdh22
3830408C21Rik	Abca9	Cdh23
4833419F23Rik	Abcb11	Adcy8
4833422C13Rik	Abcc4	Hnf1b
4833427G06Rik	Abcc6	B230303A05Rik
4921507P07Rik	Abcc9	Lypd6b
4921511C10Rik	Abcg3	Hs6st3
4921511I17Rik	Abcg5	Cpq
4921515E04Rik	Abcg8	Pde4b
4921518K17Rik	Abhd12	Sorbs2
4921524L21Rik	Abl1	Pde4d
4921529L05Rik	Ablim1	Il1r1
4921539E11Rik	Acaca	Abca9
4930404A05Rik	Acacb	Lama2
4930404I05Rik	Acot11	Gm3772
4930405D11Rik	Acoxl	Tshz2
4930412B13Rik	Acsl4	Trpm3
4930423M02Rik	Acyp2	Cpa6
4930425L21Rik	Adam22	Kif26b
4930428E07Rik	Adam23	Rbms3
4930429D17Rik	Adam28	Wdpcp
4930430J02Rik	Adam29	Nkain3
4930434J06Rik	Adam32	Nkain2
4930435E12Rik	Adamts12	B3glct
4930435F18Rik	Adamts16	Dpp10
4930438E09Rik	Adamts18	Usp46
4930441J16Rik	Adamts3	Hsf3
4930444F02Rik	Adamtsl1	Dgkk
4930444P10Rik	Adcy10	Vti1a
4930445N18Rik	Adcy2	Tmtc2
4930448F12Rik	Adcy8	Snd1
4930449E18Rik	Adgb	Dgkb
4930452A19Rik	Adgrb3	Adgrv1
4930452B06Rik	Adgrg6	Dgkg
4930459C07Rik	Adgrg7	Klf12
4930467D21Rik	Adgrl3	E030030I06Rik
4930470P17Rik	Adgrl4	Kcnc2
4930474G06Rik	Adgrv1	Bnc2
4930486I03Rik	Adra1b	Hif1a
4930486L24Rik	Adtrp	Cntnap2
4930503E24Rik	Aebp2	Dtna
4930505A04Rik	Aff2	Ago4
4930507D10Rik	Agbl4	A330008L17Rik
4930509J09Rik	Ago4	Slc41a2
4930509K18Rik	Agr3	Lrrc8c
4930511A08Rik	Agtr1b	Slc4a10
4930511E03Rik	Ahi1	Sorcs1
4930513D17Rik	Aifm3	Bicc1
4930515L03Rik	Ak5	Emilin2
4930515L19Rik	Akap12	Wdfy4
4930518J21Rik	Aldh1a3	Wdfy3
4930519F16Rik	Allc	Arhgap24
4930523O13Rik	Amotl1	Phldb2
4930524C18Rik	Ank1	Arhgap28
4930524O08Rik	Ank2	Arhgef10l
4930527G23Rik	Ank3	Slc14a2
4930532I03Rik	Ankar	Myom3
4930533B01Rik	Ankrd16	Col25a1
4930533P14Rik	Anks1b	Grm3
4930539C22Rik	Ano10	Iqschfp
4930542D17Rik	Ano2	Efna5
4930548G14Rik	Anpep	Spata9
4930548K13Rik	Aoah	Adam23
4930553C11Rik	Aoc2	Adam22
4930554G24Rik	Aox2	Adam29
4930556C24Rik	Ap4e1	Slc35f4
4930556G01Rik	Apbb1ip	Slc35f1
4930557J02Rik	App	Shtn1
4930558K02Rik	Arfgap3	Tmcc3
4930578C19Rik	Arhgap10	Phactr1
4930578E11Rik	Arhgap15	Ush2a
4930590J08Rik	Arhgap18	Phactr2
4930592A05Rik	Arhgap20	Herc1
4930592C13Rik	Arhgap24	Herc3
4931403G20Rik	Arhgap28	Focad
4931408C20Rik	Arhgap32	Herc6
4931428L18Rik	Arhgap6	Dennd1b
4931429P17Rik	Arhgef10l	Tyr
4932412D23Rik	Arhgef9	Gm20619
4932438A13Rik	Arid4b	Gm20752
4932441J04Rik	Arid5b	Gm12610
4933402J07Rik	Armc4	Lefty2
4933406J09Rik	Asah2	Phkb
4933408J17Rik	Ascc1	Plch1
4933412O06Rik	Asic2	Kdm6a
4933424G05Rik	Astn2	Lactbl1
4933425B07Rik	Asxl3	Nckap5
4933427D06Rik	Atf2	Ddah1
4933427I22Rik	Atg10	Ntpcr
4933432G23Rik	Atg4c	Fryl
4933438B17Rik	Atp11b	Apbb1ip
5031426D15Rik	Atp2b2	Dysf
5330416C01Rik	Atp7a	Peak1
5430402O13Rik	Atp8a1	Prune2
5430428K19Rik	Atrnl1	Spock1
5530401A14Rik	Atrx	Mgat4c
5730522E02Rik	Atxn7l1	Dok5
5830418P13Rik	Auts2	Cdh10
6030469F06Rik	Axdnd1	Cdh13
6030498E09Rik	B130024G19Rik	Cdh12
6430706D22Rik	B230303A05Rik	Gm5095
6430710C18Rik	B230323A14Rik	Ano2
6530403H02Rik	B3glct	4930539C22Rik
8030462N17Rik	B4galnt3	4930553C11Rik
9030204H09Rik	BC005561	Ofcc1
9130019P16Rik	BC030870	Nek10
9130227L01Rik	Bag3	Nek11
9130409I23Rik	Bank1	Rims2
9230102K24Rik	Baz2b	Ccdc152
9330111N05Rik	Bbs2	Egflam
9330117O12Rik	Bcl2	Agbl4
9330158H04Rik	Bcr	Il1rapl1
9330178D15Rik	Bicc1	Ccbe1
9330182L06Rik	Bmp6	Sfi1
9330199G10Rik	Bnc2	Nme8
9430021M05Rik	Brca1	Ppargc1b
9530036O11Rik	Bsnd	Iqck
9530052E02Rik	Btbd11	Gramd1b
9930021J03Rik	Btbd16	Patj
A230057D06Rik	Btbd9	Iqcm
A230072C01Rik	Btnl1	Atf2
A230077H06Rik	Bves	Gstt4
A230108P19Rik	C1qtnf2	Upp2
A2ml1	C2cd3	Grid2
A330008L17Rik	Cabin1	Dcdc2c
A330033J07Rik	Cacna1b	Plekhh2
A330049N07Rik	Cacna1c	Fbxl7
A330093E20Rik	Cacna1d	Baz2b
A430090L17Rik	Cacna2d1	Erg
A530072M11Rik	Cadps2	Fshr
A730008H23Rik	Caln1	Cdk5rap2
A730090N16Rik	Camk1d	Auts2
A830018L16Rik	Camkk2	Fam126a
A930003O13Rik	Camta1	Dock9
A930004D18Rik	Capn8	Dock2
A930006I01Rik	Car10	Ifi204
A930011G23Rik	Card11	Dock1
AF366264	Carmil1	Ano10
AI504432	Cask	Cyp20a1
AU019990	Caskin1	Negr1
AU023762	Casr	Ust
AV064505	Cast	Ncam2
AW495222	Casz1	Adcy10
AW549542	Catsperb	Ttbk2
AW554918	Ccbe1	Pik3c2g
Aadac	Ccdc13	Kcnq5
Aadat	Ccdc148	Ccdc162
Aamdc	Ccdc152	Asxl3
Aass	Ccdc162	Thrb
Aatf	Ccdc180	Pyroxd2
Abca13	Ccdc57	Naip2
Abca14	Ccdc85c	Plekha5
Abca16	Ccdc91	Pias1
Abca9	Ccn5	Pdzd2
Abcb4	Ccny	Cfap206
Abcb5	Cd200r2	Atp8a1
Abcb7	Cd209d	Eri3
Abcc12	Cd47	Ptprd
Abcc4	Cdh10	Pak7
Abcc6	Cdh12	Lrriq1
Abcd2	Cdh13	Fdx1
Abcd3	Cdh22	Syn2
Abcg3	Cdh23	Syn3
Abhd6	Cdh4	Cdkal1
Ablim1	Cdh9	Tcerg1l
Acaca	Cdk15	2700089I24Rik
Acap2	Cdk19	Abca13
Ace2	Cdk5rap2	Cacna2d1
Acer3	Cdk8	Ghr
Aco1	Cdkal1	Shc3
Acrv1	Ceacam-ps1	Ndst4
Acsm1	Celf2	Utrn
Acsm2	Cep112	Ptprm
Acss3	Cep55	Zdbf2
Actrt3	Cers3	Kctd1
Acvr1c	Cfap20	4930452A19Rik
Adam10	Cfap206	Fhit
Adam17	Cfap299	Cfap299
Adam18	Cfap77	Stag2
Adam2	Cgnl1	Cadps2
Adam22	Chl1	Stag1
Adam23	Chm	Dclk1
Adam29	Chn2	Dclk2
Adam32	Chordc1	Mrtfa
Adam9	Chst9	Lncenc1
Adamdec1	Ckap5	Nell1
Adamts12	Cldn34d	Zfp385b
Adamts15	Clstn2	Pip4k2a
Adamts16	Cltc	Snhg14
Adamts20	Cmip	Caln1
Adamts3	Cnih3	Litaf
Adamtsl1	Cnot10	Ntng1
Adamtsl3	Cntn4	Frk
Adarb2	Cntn5	Piezo2
Adat2	Cntnap2	Spag16
Adcy10	Cntnap4	Spag17
Adcy2	Cntnap5a	Disc1
Adcy7	Cobl	4930554G24Rik
Adcy8	Col12a1	Lrp2
Adcy9	Col25a1	Ttll7
Adgb	Col4a2	Cyp4v3
Adgra3	Col4a5	Mcc
Adgrb3	Col8a1	Asic2
Adgre4	Commd10	Pde9a
Adgrf1	Commd8	4931408C20Rik
Adgrf5	Cpa6	Itpr2
Adgrg2	Cpb1	St6galnac3
Adgrg6	Cpne4	Tmem117
Adgrl3	Cpne8	Aoah
Adgrl4	Cpq	Epb41
Adgrv1	Creb3l2	Pax5
Adh6-ps1	Cry2	3110039I08Rik
Adipor2	Csf2ra	Pax7
Adk	Csmd1	Nrxn1
Adra1a	Csmd3	Col12a1
Adra1b	Ctdspl	Kcnd2
Adss	Ctif	Psme4
Afap1l2	Ctnna1	Ugt3a1
Aff1	Ctnna3	Ank1
Aff2	Ctnnd2	Ank2
Aff3	Cubn	Ank3
Aff4	Cul4b	Synpo2
Afg3l2	Cux1	Gadl1
Aftph	Cyp20a1	Nrg3
Agbl1	Cyp4b1	Gm732
Agbl3	Cyp4f40	Dis3l2
Agbl4	Cyp4v3	Pcdh9
Agfg1	Cyyr1	Pcdh7
Agmo	D030045P18Rik	Atg10
Ago4	D5Ertd615e	Arhgap15
Agxt2	D630013N20Rik	Btbd9
Ahcyl2	D930015M05Rik	Arhgap10
Ahrr	Dab1	Hmgcll1
Aig1	Dach2	Rasal1
Airn	Dapk1	Dab1
Akap13	Dars	Dapk1
Akap4	Dcaf6	Capn8
Akap6	Dcc	Scfd1
Akap7	Dcdc2c	Galnt17
Akap9	Dclk1	Adamtsl1
Akr1c14	Dclk2	2210408I21Rik
Alcam	Dcp1a	Rabgap1l
Aldh1a1	Dctd	Lrrtm4
Aldh1l2	Dcx	Mtus2
Alg13	Ddah1	Cdh4
Alg9	Defb23	Dner
Alk	Dennd1b	Reln
Alkbh8	Dennd4c	Isx
Alms1	Dgkb	Lsamp
Alpk1	Dgkg	Gabrg3
Alpk2	Dgkk	0610010F05Rik
Als2cr11	Dicer1	1700003P14Rik
Ambra1	Dip2a	B230323A14Rik
Amph	Dip2c	Gm31641
Anapc10	Dis3l2	Kl
Anapc4	Disc1	Slc1a2
Angpt1	Dixdc1	4933425B07Rik
Angptl1	Dlg1	Nell1os
Ank1	Dlg2	Cldn34d
Ank2	Dlg5	Aff2
Ank3	Dlgap1	Dlgap2
Ankar	Dlgap2	Serp2
Ankdd1b	Dlgap5	Oprm1
Ankfn1	Dmd	Dlgap1
Ankrd11	Dmxl1	L3mbtl4
Ankrd12	Dnah5	Mdga2
Ankrd17	Dnah6	Foxn3
Ankrd26	Dnah7b	Slc39a10
Ankrd27	Dnah7c	Ehbp1
Ankrd28	Dnah8	Ncoa7
Ankrd44	Dnah9	AV064505
Ankrd55	Dnajb14	Dop1a
Anks1b	Dner	Tet2
Ano10	Dnm1l	Mthfd2l
Ano2	Dntt	Ppfibp2
Ano3	Dock1	Tesc
Ano4	Dock2	Oxr1
Antxr1	Dock9	Wif1
Antxr2	Dok5	Fbxl17
Aoah	Dop1a	Dscam
Aox3	Dpp10	Mid1
Ap1g1	Dpy19l2	5730522E02Rik
Ap1s3	Dpy19l3	Lrrc4c
Ap5m1	Dpysl2	Ppfia2
Apaf1	Dsc1	Esr1
Apbb1ip	Dscam	Pip5k1b
Apc	Dsp	Thsd4
Aplf	Dst	Inpp4b
Ar	Dtna	Gm10248
Arap2	Dync1i1	Rgs6
Arel1	Dynlrb2	Rgs7
Arfgef1	Dysf	Cntnap4
Arfgef3	E030030I06Rik	Igsf21
Arg2	E130311K13Rik	Ptpn12
Arhgap10	E2f8	Gramd1c
Arhgap12	E330023G01Rik	Slc30a4
Arhgap15	Ebf1	Armc4
Arhgap18	Ece1	Dach2
Arhgap21	Edar	Csf2ra
Arhgap24	Eef1akmt3	Frmd4b
Arhgap25	Efcab6	Ablim1
Arhgap26	Efna5	Mark3
Arhgap28	Efr3b	Mbnl1
Arhgap29	Egflam	Sox6
Arhgap39	Ehbp1	Ctnna3
Arhgap40	Ehmt2	Plcb1
Arhgap42	Emb	Plcb4
Arhgap5	Emilin2	Bves
Arhgap6	Eml1	Tbx15
Arhgdib	Eml3	Jade3
Arhgef10	Enox1	Camta1
Arhgef10l	Enpep	Kcnj6
Arhgef12	Enpp5	Tbc1d4
Arhgef26	Enpp7	Tbc1d5
Arhgef28	Epb41	Sugct
Arhgef38	Epb41l1	2700054A10Rik
Arhgef9	Epb41l2	Ccdc13
Arid1b	Epb41l4a	Anks1b
Arid4b	Eps8	Irak3
Arid5b	Erbb2	9530036O11Rik
Arih1	Erg	Sdccag8
Arl14ep	Eri3	Slc4a4
Arl15	Esr1	Parn
Arl6ip6	Ethe1	Gm20754
Armc1	Ets2	Ryr2
Armc10	Exoc6b	Dcc
Armc2	Eya2	Rims1
Armc3	Eya4	Grin2b
Armc4	F930017D23Rik	Hspa12a
Armc8	Fam122c	Mapk10
Armcx2	Fam126a	Dcx
Arnt	Fam149a	Camk1d
Arntl	Fam155a	Pld5
Arntl2	Fam189a1	Olah
Arpc2	Fam19a1	1700028E10Rik
Arpp21	Fam19a2	Msra
Asah2	Fam19a5	Tmem267
Asap1	Fancm	Ankar
Asap2	Farp1	Hrh2
Asb11	Fbxl17	Itga8
Asb12	Fbxl5	Rasgrp3
Asb3	Fbxl7	Galntl6
Asb5	Fbxo33	Itga2
Asb7	Fbxw4	Il1rapl2
Ascc3	Fbxw7	Prkn
Ash2l	Fdx1	Ccdc148
Asic2	Fendrr	Slc25a21
Asph	Fez2	Cdk8
Aspm	Fgf14	Eya4
Astn1	Fggy	Rnf150
Astn2	Fhad1	Kcnip1
Asxl3	Fhit	5530401A14Rik
Atad2	Fhod3	Vmp1
Atad2b	Filip1	Adamts3
Atf2	Flt1	Rspo2
Atf7ip2	Flt3	Pde1c
Atg10	Fmn1	Wwox
Atg3	Fmn2	Srgap1
Atg7	Fmnl2	Srgap2
Atm	Fnbp1	Kif13a
Atp10a	Focad	Schip1
Atp11c	Foxn3	Cobl
Atp13a3	Foxp1	Dnm1l
Atp13a4	Frem3	Vps13c
Atp13a5	Frk	Slc44a1
Atp1b4	Frmd4b	Fut10
Atp23	Frmd6	Slc44a5
Atp2b2	Frmpd4	Kalrn
Atp2c1	Fryl	Pik3cb
Atp8a1	Fshr	Man1a
Atp8a2	Fubp1	Ispd
Atp8b1	Furin	Hmcn1
Atp8b5	Fut10	Lrmda
Atp9b	Fyttd1	Ppp1r14c
Atrn	Gabbr2	Dmd
Atrnl1	Gabra2	Hecw2
Atxn1	Gabrg3	Nrxn3
Atxn7l1os2	Gadl1	Stim2
Auts2	Galnt17	Rora
Aven	Galnt2	Car10
B230118H07Rik	Galntl6	Card11
B230303A05Rik	Gas7	Slit3
B230323A14Rik	Gbp7	Ebf1
B3galnt2	Gfod2	Abcc4
B3galt1	Ggnbp2	Abcc6
B3glct	Ghr	Pappa
B930092H01Rik	Gjb4	Flt3
BC005537	Gm10248	Ctdspl
BC016579	Gm10280	Mef2c
BC039771	Gm10649	Iqch
BC049715	Gm10754	Themis
Babam2	Gm10790	Grk3
Bach2	Gm11240	Dsc1
Bank1	Gm11468	Dync1i1
Baz1b	Gm12610	Ttc28
Baz2b	Gm12830	Prkar1b
Bbox1	Gm14005	Pik3c3
Bbs2	Gm15246	A930011G23Rik
Bbs7	Gm15506	Hint3
Bbs9	Gm15555	Kcnh7
Bbx	Gm19303	Pard3
Bcas3	Gm19500	Znrf1
Bckdhb	Gm20139	Znrf3
Bclaf1	Gm20619	Cacna1c
Bdh2	Gm20752	Cacna1d
Bdnf	Gm20754	Npas2
Bdp1	Gm2087	Celf2
Becn1	Gm29669	Vsir
Bend4	Gm29684	2700049A03Rik
Bend5	Gm31641	Ctnnd2
Best3	Gm32014	Usp29
Bfsp1	Gm364	Pcdh15
Bfsp2	Gm3716	Pkhd1
Bicc1	Gm3772	Bank1
Bicd1	Gm38407	Zbtb20
Bicdl1	Gm5095	Dnah7c
Birc6	Gm5134	Stra8
Bmp3	Gm525	2510009E07Rik
Bmp5	Gm5893	Gm5893
Bmper	Gm6313	Khdrbs2
Bmpr1b	Gm6578	Shroom3
Bmpr2	Gm732	Arhgap18
Bmt2	Gm7854	Shroom4
Bnc2	Gnao1	Pde11a
Boc	Gnaq	Tmem232
Bod1l	Gnas	Mctp2
Borcs5	Gpat4	Tgfbr3
Bpifa6	Gpc3	Acaca
Brd8	Gpc5	Fmn1
Brdt	Gpr180	Fmn2
Brinp1	Gramd1b	Adgb
Brinp3	Gramd1c	Cep112
Brip1	Grb14	Myt1l
Brwd3	Grid2	Tmem220
Btaf1	Grik1	Gm32014
Btbd7	Grik3	Lhfpl3
Btbd9	Grik4	Sil1
Btc	Grin2a	Atp2b2
Btrc	Grin2b	Sema5a
Bves	Grk3	Scel
C1ql3	Grm3	Tmem135
C1qtnf7	Grm4	Nsf
C530008M17Rik	Grm5	Ralyl
C630028M04Rik	Grm7	Adamts12
C7	Grm8	Syt14
C730014E05Rik	Grxcr2	Adamts16
C8b	Gsg1l	Mannr
C9	Gstt4	Mei4
Cabcoco1	Gtf3c3	Adgrl3
Cacna1c	Gucy1b2	Tcf4
Cacna1d	Habp2	Pikfyve
Cacna1e	Hdx	Nrcam
Cacna1s	Hebp1	Scn8a
Cacna2d1	Hecw2	Dctd
Cacna2d3	Herc1	Tox
Cacna2d4	Herc3	Mmp7
Cacnb2	Herc6	Tspear
Cacnb4	Hif1a	Rsu1
Cacng5	Hint3	A830018L16Rik
Cacul1	Hip1	Tasp1
Cadm1	Hk1	Arid5b
Cadm2	Hkdc1	Mtus1
Cadps	Hmcn1	Tnik
Cadps2	Hmgcll1	Chst9
Calhm6	Hmox2	Adgrb3
Caln1	Hnf1b	Lgr5
Camk1d	Hnf4a	Nfib
Camk2d	Hnf4aos	Abcg3
Camk4	Hnrnpd	Myrip
Camkmt	Hrg	Mamdc2
Camta1	Hrh2	Pakap
Canx	Hs3st4	Adgrl4
Cap2	Hs6st3	Fggy
Capn8	Hsd11b1	Mertk
Capn9	Hsd17b2	Zfp804b
Caprin1	Hsd17b3	Kcnk10
Car10	Hsf3	3830408C21Rik
Car3	Hspa12a	Gm29684
Car8	Hydin	Gm15246
Card11	Ids	Pard3b
Carf	Ifi204	Snx29
Casc1	Ift57	Fgf14
Casd1	Igsf21	Plac1
Cask	Il15	Sdk1
Casp7	Il15ra	Enpp5
Casp8	Il1a	Gnaq
Casp8ap2	Il1r1	Gnas
Cass4	Il1rapl1	Robo2
Cast	Il1rapl2	Ccdc91
Catsper2	Il1rl2	Kcnk9
Cbfb	Immp2l	Ptpn4
Cbl	Inpp4b	Prkg1
Cblb	Insr	Neil3
Cbx5	Ints11	Pdzph1
Ccar1	Iqca	Hdx
Ccbe1	Iqch	Foxp1
Ccdc13	Iqck	Rbfox3
Ccdc141	Iqcm	Sncaip
Ccdc148	Iqschfp	Rbfox1
Ccdc149	Irak3	Fam19a1
Ccdc15	Ispd	Cubn
Ccdc152	Isx	Cpb1
Ccdc162	Itga10	Xylt1
Ccdc171	Itga2	Palmd
Ccdc173	Itga8	Cgnl1
Ccdc178	Itgb2	Ttc13
Ccdc192	Itgb3	Pdcd1lg2
Ccdc38	Itgb3bp	Immp2l
Ccdc63	Itgb5	Grik4
Ccdc70	Itih2	Dlg2
Ccdc73	Itpkb	Kcnk2
Ccdc81	Itpr2	Samd4
Ccdc88a	Jade3	4930428E07Rik
Ccdc91	Jph2	Tmem132d
Ccnb3	Kalrn	Sema6d
Ccnd2	Kcnc2	Tmem132c
Ccng1	Kcnd2	D630013N20Rik
Ccnt2	Kcnd3	Efcab6
Ccny	Kcnh1	Zfp982
Ccp110	Kcnh5	Palm2
Ccr3	Kcnh7	Ripor2
Ccser1	Kcnip1	Nek1
Ccser2	Kcnip3	Slc26a8
Cd109	Kcnj6	Smoc1
Cd200r4	Kcnk10	Rtl4
Cd2ap	Kcnk2	4930578E11Rik
Cd36	Kcnk9	Kcnt2
Cd46	Kcnq5	Zbtb44
Cd96	Kcnt2	Gpc5
Cdc14a	Kctd1	Nol4
Cdc14b	Kctd16	Lef1
Cdc16	Kdm3b	Fbxw4
Cdc27	Kdm6a	Fbxw7
Cdc42	Khdrbs2	Il1rl2
Cdc42bpa	Kif13a	Bbs2
Cdc73	Kif26b	Cntnap5a
Cdh10	Kl	Astn2
Cdh11	Klf12	Col4a5
Cdh12	Klhl3	Adam32
Cdh13	Krt39	Trpc7
Cdh18	Ksr2	Trpc5
Cdh20	L3mbtl3	Ksr2
Cdh22	L3mbtl4	St3gal3
Cdh23	LOC100043315	Nfatc2
Cdh4	Lactbl1	Dnah6
Cdh6	Lama2	Dnah5
Cdh8	Lars2	Dnah8
Cdk12	Lcp1	Dnah9
Cdk14	Ldb3	Slc9a9
Cdk5rap2	Ldlrad4	Rtn1
Cdk8	Lef1	Tnn
Cdkal1	Lefty2	Dlg1
Cdkl2	Lgi1	Hs3st4
Cdkl3	Lgr5	Dlg5
Cdkl5	Lhfpl3	Nectin3
Cdyl	Limd1	4932441J04Rik
Cdyl2	Lin7a	Farp1
Ceacam10	Lingo1	St8sia1
Celf2	Litaf	Tanc2
Celf6	Lmln	Adgrg6
Cemip2	Lmx1a	Rn45s
Cep112	Lncenc1	Cntn4
Cep128	Lrmda	Cntn5
Cep135	Lrp2	Gpc3
Cep192	Lrrc20	Snrpn
Cep350	Lrrc36	Rfx4
Cep76	Lrrc49	Epb41l4a
Cep83	Lrrc4c	1700024I08Rik
Cep83os	Lrrc6	Lcp1
Cep89	Lrrc7	Nedd4l
Cerkl	Lrrc8c	Clstn2
Cers4	Lrrc8d	Enox1
Cers6	Lrriq1	Ube2d3
Ces1c	Lrrk1	Nlgn1
Cfap206	Lrrtm4	Dars
Cfap299	Lsamp	Lrrc7
Cfap54	Luzp2	Lmx1a
Cfap97	Ly86	Myo18b
Cgnl1	Lypd6b	Nwd2
Chchd3	Magi1	Tenm3
Chd2	Mamdc2	Tenm2
Chd7	Man1a	Tenm1
Chd8	Mannr	Tenm4
Chd9	Map3k20	Myo16
Chfr	Map3k21	2810404M03Rik
Chia1	Map3k5	4921539E11Rik
Chic2	Mapk10	Sox5
Chil4	Mapt	Fhod3
Chil6	Marchf1	Luzp2
Chit1	Marchf11	Zranb3
Chl1	Mark3	Grik1
Chmp4c	Mast4	Grik3
Chn1	Mbd2	Prkce
Chrm3	Mbnl1	Cask
Chrna7	Mboat1	Cast
Chrnb3	Mbp	Adra1b
Chrnb4	Mcc	Ntrk2
Chst7	Mctp2	Grm5
Chst9	Mdga2	Chl1
Chsy3	Mef2c	Fam19a2
Chuk	Megf11	Slc8a3
Cidec	Megf6	E2f8
Ckap2l	Mei4	Fancm
Clasp2	Mertk	Thsd7b
Clca1	Mgat4c	Grm7
Clcn5	Mgmt	Frmpd4
Clcnka	Mid1	Zfpm2
Cldn14	Mir7670	Prrx1
Cldn34d	Mlip	Atrnl1
Clec4a1	Mlxip	Csmd3
Clec4n	Mmp7	Rapgef6
Clint1	Mn1	Csmd1
Clip4	Mroh7	Mast4
Clnk	Mrtfa	Grm4
Clpx	Msh3	Vstm4
Clspn	Msi2	Gm10649
Clstn2	Msra	Rgs17
Cltrn	Msrb3	Arhgap6
Clvs1	Mss51	Marchf1
Clybl	Mterf1b
Cmc1	Mthfd2l
Cmc4	Mtmr1
Cmss1	Mtus1
Cmtm8	Mtus2
Cmya5	Mvk
Cnga3	Myo16
Cnih3	Myo18b
Cnot1	Myom2
Cnot10	Myom3
Cnot3	Myrip
Cnot6l	Myt1l
Cnr1	Naip2
Cnrip1	Napb
Cnst	Nav1
Cntd1	Ncam2
Cntln	Nckap5
Cntn1	Ncoa7
Cntn3	Ndst4
Cntn4	Ndufaf2
Cntn5	Nectin3
Cntn6	Nedd4l
Cntnap2	Negr1
Cntnap3	Neil3
Cntnap4	Nek1
Cntnap5a	Nek10
Cntnap5b	Nek11
Cntnap5c	Nell1
Cobl	Nell1os
Cobll1	Nfatc2
Cog5	Nfib
Col12a1	Ngfr
Col19a1	Nhsl1
Col24a1	Nkain2
Col25a1	Nkain3
Col28a1	Nlgn1
Col4a3	Nmd3
Col4a4	Nme8
Col4a5	Nol4
Col4a6	Nol4l
Col5a1	Nos1
Col6a4	Npas2
Col6a6	Nr3c1
Colec10	Nr5a2
Commd1	Nrcam
Cop1	Nrg3
Copg2	Nrp2
Coq3	Nrxn1
Corin	Nrxn3
Cox10	Nsf
Cox16	Nsg2
Cp	Ntf3
Cpa6	Ntm
Cpb1	Ntng1
Cpd	Ntpcr
Cpe	Ntrk2
Cpeb1	Nuak1
Cpeb2	Numb
Cped1	Nwd2
Cpne1	Obscn
Cpne4	Oc90
Cpne5	Ofcc1
Cpne8	Olah
Cpq	Oprm1
Cps1	Otop1
Cpsf2	Otop2
Cpvl	Otud7a
Cpxm2	Ovgp1
Cradd	Oxr1
Crb1	Pabpc1l
Creb1	Pak7
Creb5	Pakap
Crebbp	Palm2
Crebrf	Palmd
Crem	Pappa
Crim1	Pard3
Crisp4	Pard3b
Crtac1	Parn
Cry1	Patj
Cryl1	Pax2
Cse1l	Pax3
Csf2ra	Pax5
Csgalnact1	Pax7
Csmd1	Pcdh15
Csmd2	Pcdh7
Csmd2os	Pcdh9
Csmd3	Pcsk5
Csnk1g1	Pdcd1lg2
Csnk2a1	Pde11a
Cst13	Pde1a
Cstf3	Pde1c
Ctdspl	Pde4b
Ctnna2	Pde4d
Ctnna3	Pde6a
Ctnnbl1	Pde7b
Ctnnd2	Pde9a
Ctps2	Pdgfc
Ctse	Pdgfrb
Cttnbp2	Pdzd2
Cubn	Pdzd7
Cul2	Pdzph1
Cwf19l2	Peak1
Cxxc4	Pecam1
Cyfip1	Pfkp
Cylc1	Phactr1
Cylc2	Phactr2
Cyp19a1	Phkb
Cyp20a1	Phldb2
Cyp2c65	Pias1
Cyp2c70	Piezo2
Cyp39a1	Pik3c2a
Cyp4b1	Pik3c2g
Cyp4v3	Pik3c3
Cyp4x1	Pik3cb
Cyp7b1	Pikfyve
Cytip	Pip4k2a
D030024E09Rik	Pip5k1b
D030068K23Rik	Pkhd1
D130009I18Rik	Plac1
D3Ertd254e	Plcb1
D430041D05Rik	Plcb4
D430042O09Rik	Plch1
D630013N20Rik	Pld5
D630023F18Rik	Pldi
D6Ertd474e	Plekha4
D6Wsu163e	Plekha5
D930032P07Rik	Plekhb2
Dab1	Plekhg1
Dab2	Plekhh2
Dach1	Pml
Dach2	Pnoc
Dad1	Polk
Dao	Pou2f2
Dap3	Pou6f2
Dapk1	Ppargc1b
Dars	Ppfia2
Dcaf6	Ppfibp2
Dcaf8	Ppp1r14c
Dcc	Ppp1r21
Dcdc2c	Ppwd1
Dchs2	Prdm16
Dclk1	Prickle1
Dclk2	Prickle2
Dcn	Prima1
Dctd	Prkar1b
Dcun1d1	Prkce
Dcun1d3	Prkg1
Dcx	Prkn
Ddah1	Prrx1
Ddb2	Prune2
Ddo	Psd3
Ddx10	Psme4
Ddx46	Pter
Ddx60	Ptpn12
Defb1	Ptpn4
Dek	Ptprb
Dennd1a	Ptprc
Dennd1b	Ptprd
Dennd4a	Ptprg
Dennd5b	Ptprk
Depdc1b	Ptprm
Dera	Ptprq
Dgkb	Ptprt
Dgkg	Pus10
Dgkh	Pyroxd2
Dgkk	Rab37
Dhodh	Rab3b
Dhx35	Rab3c
Dhx36	Rab8b
Dhx57	Rabgap1l
Diaph2	Rad51b
Diaph3	Ralyl
Dip2b	Ranbp3l
Dip2c	Rapgef4
Dis3l2	Rapgef6
Disc1	Raph1
Dkk2	Rasal1
Dlc1	Rasal2
Dlg1	Rasgrp3
Dlg2	Rbbp5
Dlg5	Rbfox1
Dlgap1	Rbfox3
Dlgap2	Rbms3
Dmd	Reln
Dmgdh	Rfx4
Dmrt1	Rgr
Dmtf1	Rgs17
Dnah11	Rgs20
Dnah5	Rgs6
Dnah6	Rgs7
Dnah7c	Rims1
Dnah8	Rims2
Dnah9	Ripor2
Dnaic1	Ripor3
Dnajc13	Rn45s
Dnajc6	Rnf150
Dnal1	Rnf217
Dnase2b	Robo2
Dner	Rora
Dnm1l	Rpap3
Dnm3	Rpn1
Dock1	Rsbn1
Dock2	Rspo2
Dock3	Rsu1
Dock4	Rtl4
Dock5	Rtn1
Dock8	Rtn4rl2
Dock9	Ryr2
Dok5	Sacs
Dok6	Samd4
Dop1a	Scel
Dpf3	Scfd1
Dph6	Schip1
Dpp10	Sclt1
Dpp3	Scmh1
Dpp6	Scn8a
Dpyd	Sdc4
Dpysl2	Sdccag8
Dram2	Sdk1
Drc7	Sdk2
Drosha	Sema5a
Dsc1	Sema5b
Dscam	Sema6d
Dsg2	Serp2
Dsp	Serpinb2
Dspp	Sez6l
Dst	Sfi1
Dstyk	Sfmbt2
Dtd1	Sgcd
Dtna	Sgcz
Dtnb	Sh2d1b1
Dtwd1	Sh3gl2
Dusp27	Sh3rf1
Dym	Shc3
Dync1i1	Shisal2b
Dync2h1	Shld2
Dysf	Shroom3
Dzip1	Shroom4
E030030I06Rik	Shtn1
E030044B06Rik	Sil1
E130006D01Rik	Skap2
E130307A14Rik	Slain1
E2f7	Slamf6
E2f8	Slc13a5
E330013P04Rik	Slc14a2
Eaf2	Slc16a1
Ebag9	Slc1a2
Ebf1	Slc22a19
Ebf2	Slc22a2
Ebf4	Slc23a4
Ect2	Slc25a20
Eda	Slc25a21
Edem3	Slc25a23
Edil3	Slc25a26
Edn1	Slc26a8
Eef1e1	Slc2a2
Eefsec	Slc30a4
Eepd1	Slc35f1
Efcab10	Slc35f4
Efcab3	Slc39a10
Efcab6	Slc39a11
Efcab7	Slc41a2
Efcc1	Slc44a1
Efemp1	Slc44a5
Efhc2	Slc45a1
Efl1	Slc4a10
Efna5	Slc4a4
Egf	Slc5a11
Egfem1	Slc5a5
Egflam	Slc6a4
Egfr	Slc8a3
Ehbp1	Slc9a2
Ehd2	Slc9a9
Ehd4	Slc9b2
Ehmt1	Slco1a6
Eif2ak4	Slit3
Eif2b3	Slitrk2
Eif2s1	Smo
Eif3a	Smoc1
Eif3j1	Smpd4
Eif3j2	Smyd4
Elac2	Sncaip
Elavl2	Snd1
Elavl4	Snhg14
Ell2	Snrpn
Elmo1	Snx29
Elp4	Sorbs2
Emcn	Sorcs1
Emilin2	Sos1
Eml6	Sox5
Enah	Sox6
Enkur	Spaca7
Enox1	Spag16
Enox2	Spag17
Enpp3	Spast
Enpp5	Spata9
Entpd1	Spidr
Entpd4	Spns2
Entpd4b	Spock1
Epb41	Sptlc3
Epb41l3	Srgap1
Epb41l4a	Srgap2
Epb41l4b	Srgap3
Epb41l5	Srgn
Epc1	Sspo
Epcam	Ssr1
Epha3	St3gal3
Epha4	St6galnac3
Epha5	St8sia1
Epha6	St8sia5
Ephb1	Stag1
Epm2a	Stag2
Epsti1	Stim2
Epyc	Stmnd1
Erap1	Ston2
Erbb4	Stpg4
Erbin	Stra8
Erc1	Strip2
Erc2	Stxbp1
Ereg	Sufu
Erg	Sugct
Eri3	Syn2
Erich1	Syn3
Erich3	Synpo2
Erp44	Syt1
Esf1	Syt13
Esr1	Syt14
Esrrb	Syt9
Esrrg	T2
Esyt2	Tanc2
Etfdh	Tarsl2
Etl4	Tasp1
Etv1	Tbc1d4
Etv6	Tbc1d5
Evi2	Tbx15
Evi2a	Tbxas1
Evi5l	Tcea3
Exoc2	Tcerg1l
Exoc3	Tcf4
Exoc4	Tcp11x2
Exoc5	Tead2
Exoc6b	Tead4
Eya4	Tecta
Ezh2	Tenm1
F11	Tenm2
F11r	Tenm3
F13a1	Tenm4
F630206G17Rik	Tesc
Fabp12	Tet2
Faf1	Tex22
Fam107b	Tfec
Fam110b	Tgfbr3
Fam114a1	Thbs4
Fam126a	Themis
Fam126b	Thrb
Fam135a	Thsd4
Fam13c	Thsd7b
Fam149a	Tiam2
Fam155a	Timp3
Fam160a1	Tiparp
Fam168a	Tldc1
Fam169b	Tll2
Fam171a1	Tmcc1
Fam172a	Tmcc3
Fam193a	Tmco4
Fam198b	Tmem117
Fam19a1	Tmem132b
Fam19a2	Tmem132c
Fam19a4	Tmem132d
Fam219a	Tmem135
Fam49a	Tmem150c
Fam83b	Tmem220
Fanca	Tmem232
Fanci	Tmem266
Fancl	Tmem267
Fancm	Tmem45a
Far2	Tmem56
Farp1	Tmod2
Farp2	Tmprss11c
Fars2	Tmtc1
Farsb	Tmtc2
Fat3	Tnc
Faxc	Tnik
Fbh1	Tnn
Fbn1	Tnni3k
Fbn2	Tox
Fbxl13	Tox2
Fbxl17	Traf5
Fbxl2	Trem3
Fbxl3	Trpa1
Fbxl7	Trpc5
Fbxo24	Trpc7
Fbxo3	Trpm3
Fbxo4	Trpm8
Fbxo47	Tshz2
Fbxo7	Tsix
Fbxw11	Tspear
Fbxw2	Ttbk2
Fbxw4	Ttc13
Fbxw7	Ttc28
Fcer2a	Ttll7
Fcho2	Tyr
Fchsd2	Ubash3a
Fcrl5	Ube2d3
Fdx1	Ube2e1
Fech	Ubn2
Fer	Uchl1os
Fermt2	Ugt3a1
Fgf12	Unc5d
Fgf13	Upp2
Fgf14	Ush2a
Fggy	Usp25
Fhdc1	Usp29
Fhit	Usp43
Fhitos	Usp45
Fhod3	Usp46
Fignl1	Usp6nl
Filip1l	Ust
Fip1l1	Utrn
Fli1	Vamp5
Flnb	Vav1
Flt3	Vmn2r16
Fmn1	Vmn2r90
Fmn2	Vmp1
Fmo5	Vps13c
Fn1	Vps13d
Fnbp1l	Vps50
Fndc3a	Vsir
Fndc3c1	Vstm4
Fntb	Vti1a
Focad	Vwa3a
Foxn3	Vwa5b1
Foxp1	Vwf
Foxp2	Wdfy3
Fpr2	Wdfy4
Fras1	Wdpcp
Frk	Wdr64
Frmd3	Wdtc1
Frmd4a	Wif1
Frmd4b	Wscd2
Frmd5	Wwox
Frmpd1	Xist
Frmpd4	Xylt1
Fry	Yeats2
Fryl	Zbtb20
Fsd2	Zbtb44
Fshr	Zc2hc1b
Fstl1	Zdbf2
Fstl4	Zdhhc15
Fstl5	Zdhhc2
Fto	Zfp385b
Fubp1	Zfp423
Fut10	Zfp532
Fut8	Zfp704
Fut9	Zfp800
Fyb2	Zfp804b
G530011O06Rik	Zfp831
Gab1	Zfp982
Gab2	Zfpm2
Gabpa	Zfyve9
Gabra3	Znrf1
Gabra5	Znrf3
Gabrb1	Zranb3
Gabrb2	Zswim6
Gabrb3
Gabrg1
Gabrg3
Gadl1
Gak
Galnt1
Galnt13
Galnt14
Galnt15
Galnt17
Galnt18
Galnt5
Galnt6
Galntl6
Garem1
Gas2
Gbe1
Gbf1
Gbp2b
Gbp3
Gbp5
Gcc2
Gda
Gdpd4
Gemin6
Gfod1
Gfra1
Ggact
Ggnbp2
Ghitm
Ghr
Ghsr
Gigyf2
Gipc2
Gjc3
Glb1l2
Glcci1
Gli2
Glis3
Glra2
Glra3
Glrb
Glt8d1
Glud1
Glyat
Gm10248
Gm10635
Gm10649
Gm10732
Gm10754
Gm11563
Gm11696
Gm12374
Gm12610
Gm13490
Gm13544
Gm13986
Gm14015
Gm14461
Gm14634
Gm14664
Gm15246
Gm15486
Gm15555
Gm15723
Gm15787
Gm15816
Gm15939
Gm16070
Gm16223
Gm16630
Gm16701
Gm16863
Gm17359
Gm17644
Gm19522
Gm19689
Gm19782
Gm20063
Gm20110
Gm20498
Gm20619
Gm20752
Gm20754
Gm20756
Gm20757
Gm2093
Gm2115
Gm2560
Gm26851
Gm28590
Gm29536
Gm29683
Gm29684
Gm29687
Gm30606
Gm31508
Gm31641
Gm32014
Gm32926
Gm33340
Gm34068
Gm35206
Gm36201
Gm364
Gm37013
Gm3772
Gm38414
Gm38666
Gm38667
Gm3985
Gm438
Gm45935
Gm4710
Gm4876
Gm5086
Gm5087
Gm5089
Gm5095
Gm5106
Gm5127
Gm5441
Gm5860
Gm5893
Gm595
Gm6260
Gm6602
Gm6614
Gm6878
Gm7173
Gm732
Gm765
Gm8298
Gm8630
Gm8787
Gm884
Gm960
Gm9733
Gm9920
Gmds
Gmnc
Gna15
Gnai1
Gnal
Gnaq
Gnas
Gne
Golga1
Golga4
Golim4
Gosr2
Gpa33
Gpatch2
Gpc3
Gpc4
Gpc5
Gpc6
Gpd2
Gphn
Gpm6a
Gpm6b
Gpnmb
Gpr137c
Gpr139
Gpr158
Gpr161
Gpr173
Gpr176
Gpr55
Gprasp1
Gprc6a
Gramd1b
Gramd1c
Gramd3
Grb10
Greb1l
Grem2
Gria1
Gria2
Gria3
Gria4
Grid1
Grid2
Grik1
Grik2
Grik3
Grik4
Grin2b
Grin3a
Grip1
Grk3
Grm1
Grm3
Grm4
Grm5
Grm7
Grm8
Gsap
Gsg1l
Gstt4
Gtdc1
Gtf2e1
Gtf2e2
Gtf2f2
Gtf2h2
Gtf2ird2
Gucy1a1
Gucy1a2
Gucy2c
Gulp1
Gxylt2
Hacd1
Hacd2
Hao1
Hapln1
Has1
Haus6
Havcr2
Hcfc2
Hcn1
Hcn3
Hdac2
Hdac8
Hdac9
Hdlbp
Hdx
Hecw1
Hecw2
Heg1
Hepacam
Heph
Herc1
Herc2
Herc3
Herc6
Herpud2
Hgf
Hhat
Hhla1
Hibadh
Hibch
Hif1a
Hint3
Hipk1
Hivep1
Hivep2
Hjurp
Hlcs
Hltf
Hmbox1
Hmcn1
Hmg20a
Hmga2
Hmgcll1
Hnf1b
Hnmt
Hnrnph3
Hoga1
Homer1
Hook3
Hpgd
Hprt
Hpse2
Hrh2
Hrh4
Hs3st2
Hs3st3a1
Hs3st4
Hs3st5
Hs6st2
Hs6st3
Hsbp1l1
Hsd11b1
Hsd17b12
Hsd17b13
Hsd17b4
Hsf3
Hspa12a
Hspa9
Htd2
Htr1f
Htr2c
Htr4
Htr7
Htra3
Htt
Huwe1
Ibsp
Ibtk
Ica1
Ifi204
Ifih1
Ifit1bl1
Ifnar2
Ifngas1
Ift43
Ift74
Ift81
Ift88
Igf1
Igf1r
Igsf11
Igsf21
Ikzf1
Ikzf2
Il13ra1
Il1r1
Il1rap
Il1rapl1
Il1rapl2
Il1rl2
Il5ra
Il7
Ilkap
Immp1l
Immp2l
Impg1
Inpp4b
Inpp5f
Insc
Insig2
Ints13
Ints9
Invs
Ipcef1
Ipo11
Ipo7
Ipw
Iqch
Iqck
Iqcm
Iqgap2
Iqschfp
Iqsec2
Iqub
Irak3
Ispd
Ist1
Isx
Itch
Itfg1
Itga1
Itga2
Itga8
Itga9
Itgad
Itgb1
Itgb6
Itih5l-ps
Itm2b
Itpr1
Itpr2
Itpr3
Itprid1
Itsn1
Jade3
Jakmip2
Jarid2
Jazf1
Jmjd1c
Kalrn
Kank4
Kansl1
Katna1
Kazn
Kbtbd8os
Kcnab1
Kcnc2
Kcnd2
Kcnh7
Kcnh8
Kcnip1
Kcnip4
Kcnj16
Kcnj3
Kcnj6
Kcnk10
Kcnk2
Kcnk9
Kcnma1
Kcnn2
Kcnq1
Kcnq3
Kcnq5
Kcnt2
Kcnu1
Kctd1
Kctd16
Kctd8
Kdm4c
Kdm4d
Kdm6a
Kdsr
Khdrbs1
Khdrbs2
Kidins220
Kif13a
Kif13b
Kif16b
Kif18a
Kif1b
Kif20b
Kif21a
Kif26b
Kif3a
Kif5c
Kif6
Kif9
Kifap3
Kin
Kir3dl2
Kirrel3
Kitl
Kl
Klf11
Klf12
Klf7
Klf8
Klhl1
Klhl14
Klhl28
Klhl32
Klhl4
Klhl6
Klhl7
Klra12
Klra13-ps
Klra15
Klra22
Klra23
Klre1
Kntc1
Kras
Krit1
Krt75
Krt85
Ksr2
Ktn1
Kynu
L3mbtl4
Lactbl1
Lama1
Lama2
Lama3
Lama4
Lamb1
Lamp5
Large1
Larp4b
Lca5
Lclat1
Lcorl
Lcp1
Ldb2
Lef1
Lefty2
Lekr1
Lemd3
Lepr
Lgals12
Lgr5
Lgsn
Lhcgr
Lhfpl2
Lhfpl3
Lin54
Lin7c
Lincred1
Lingo2
Litaf
Lix1
Lmf1
Lmo3
Lmx1a
Lncenc1
Lnp1
Lnpk
Lonp2
Lonrf2
Loxhd1
Loxl2
Lpar3
Lpin2
Lpp
Lrba
Lrch2
Lrfn5
Lrguk
Lrif1
Lrmda
Lrp1b
Lrp2
Lrp6
Lrp8
Lrrc15
Lrrc19
Lrrc31
Lrrc34
Lrrc4c
Lrrc69
Lrrc7
Lrrc74a
Lrrc8b
Lrrc8c
Lrrcc1
Lrrfip2
Lrriq1
Lrriq3
Lrrk2
Lrrn1
Lrrtm3
Lrrtm4
Lsamp
Lsm5
Lsp1
Ltbp1
Luc7l2
Luzp2
Ly96
Lyn
Lypd6b
Lypla1
Lyrm4
Lysmd3
Lyst
Lyzl4
Macf1
Macrod2
Mael
Mageb16
Mageb18
Magi1
Magi2
Magi3
Malrd1
Mamdc2
Maml3
Man1a
Man1a2
Man1c1
Man2a1
Manba
Mannr
Maob
Map2
Map2k4
Map2k5
Map2k6
Map2k7
Map3k15
Map3k7
Map4
Map4k4
Map4k5
Map7d2
Mapk10
Mapk4
Mapkap1
Mapkapk5
Marchf8
Marchf4
Marchf3
Mtarc2
Marchf6
Marchf1
Mark3
Mas1
Mast2
Mast4
Mastl
Matn3
Mb
Mbd5
Mbip
Mbnl1
Mbnl2
Mboat2
Mcc
Mccc1
Mccc2
Mcf2
Mcm9
Mcmbp
Mctp1
Mctp2
Mcts1
Mcu
Mdfic
Mdga2
Mdm4
Me2
Me3
Mecom
Med12l
Med13
Med13l
Med26
Mef2a
Mef2c
Mefv
Meg3
Megf10
Mei4
Meis1
Meis2
Melk
Memo1
Meox2
Mertk
Met
Metap1
Metap1d
Mettl14
Mettl15
Mettl25
Mettl8
Mfn1
Mfsd6
Mfsd8
Mga
Mgam
Mgat4c
Mgp
Mib1
Micalcl
Micu3
Mid1
Mier1
Mier3
Mindy3
Mindy4
Mipep
Mipol1
Mir99ahg
Mitf
Mkln1
Mkx
Mlip
Mllt3
Mmp16
Mmp7
Mmrn1
Mmrn2
Mnd1
Mob1a
Mob4
Mon2
Morc1
Morc4
Morn5
Mospd1
Mospd2
Mpdz
Mpp4
Mpp5
Mpp6
Mpp7
Mpped1
Mpped2
Mprip
Mrc1
Mrgprx2
Mroh2a
Mroh9
Mrpl3
Mrpl50
Mrps18c
Mrps36
Mrrf
Mrtfa
Mrtfb
Ms4a4a
Msantd3
Msn
Msra
Mss51
Mtf1
Mthfd1
Mthfd1l
Mthfd2l
Mtif2
Mtm1
Mtmr7
Mtr
Mtus1
Mtus2
Mtx2
Muc19
Musk
Mvb12b
Mybl1
Mybpc1
Mycbp2
Myh11
Myh15
Myh8
Mylk
Mylk3
Mylk4
Myo16
Myo18b
Myo1d
Myo1e
Myo3a
Myo3b
Myo5a
Myo5b
Myo6
Myo9a
Myocd
Myom3
Myot
Mypn
Myrip
Myt1
Myt1l
N4bp1
Naaa
Naaladl2
Nae1
Naip2
Nalcn
Nanp
Napg
Nars
Nars2
Nav2
Nav3
Nbas
Nbea
Ncam1
Ncam2
Ncapd3
Ncapg
Ncapg2
Nck1
Nckap5
Ncl
Ncoa1
Ncoa2
Ncoa5
Ncoa7
Ndfip1
Ndfip2
Ndst4
Ndufaf5
Ndufs4
Neb
Nebl
Necab1
Nectin3
Nedd4l
Negr1
Neil3
Nek1
Nek10
Nek11
Nell1
Nell1os
Neo1
Neto1
Neto2
Neurod6
Nexmif
Nf1
Nfatc2
Nfatc3
Nfe2l2
Nfia
Nfib
Nfkb1
Nhlrc2
Nhs
Nhsl2
Ninj2
Nipa2
Nipal1
Nipal2
Nipbl
Nkain2
Nkain3
Nlgn1
Nlk
Nlrp1b
Nlrp4b
Nme7
Nme8
Nmnat3
Nnt
Nol4
Nos1ap
Nox3
Nox4
Npas2
Npas3
Npbwr1
Npepps
Npffr2
Npnt
Npsr1
Nr1h4
Nr2c1
Nr3c2
Nr6a1
Nrbf2
Nrcam
Nrd1
Nrg1
Nrg2
Nrg3
Nrg3os
Nrp1
Nrxn1
Nrxn3
Nsf
Nt5c1b
Nt5c2
Nt5dc1
Ntm
Ntn1
Ntng1
Ntpcr
Ntrk2
Ntrk3
Nubpl
Nudcd1
Nudt21
Nup160
Nup62cl
Nup98
Nwd1
Nwd2
Nxn
Nxph2
Nxt2
Nyap2
Oca2
Ociad2
Ocln
Odc1
Ofcc1
Ogt
Ola1
Olah
Olfm3
Olfm4
Olfr1009
Olfr110
Olfr1246
Olfr1300-ps1
Olfr702
Olfr745
[truncated: 1,146 more rows]
